# Supplementary material for: Severe Acute Myocarditis after the Third (Booster) Dose of mRNA COVID-19 Vaccination
Source: MDPI journal article supplement (doi:10.3390/vaccines10040575), 2022-04-08

## Supplementary Appendix

### Fulminant Myocarditis After BNT162b2 Vaccine Booster Against COVID-19

Asleh R et al.

**Figure S1.** Full 2-lead recording from a wearable cardioverter-defibrillation (LifeVest) of the same event presented in figure 2S, demonstrating sustained monomorphic ventricular tachycardia lasting for 94 seconds, ultimately terminated by a successful electrical shock.

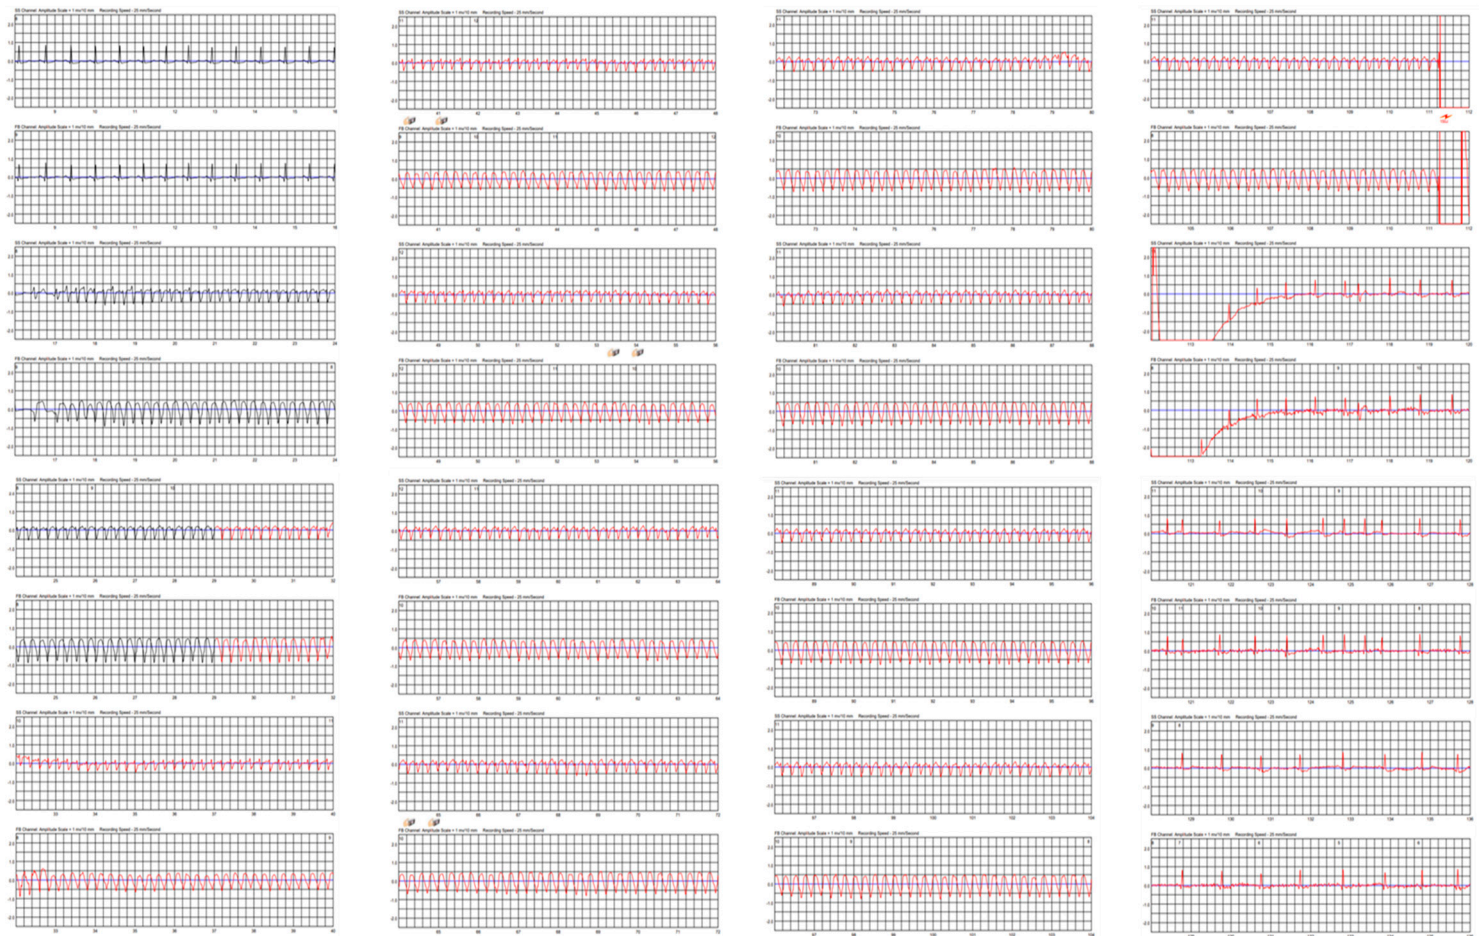

**Figure S2.** Cardiac MRI (3T) at 3 months of follow-up. (D) A short axis view LGE image showing a transmural LGE in the inferolateral wall (red arrow). (E) A T2 mapping image showing no myocardial edema with normal regional T2 values (up to 45 milliseconds) in the lateral and inferolateral walls. (F) A three-chamber view LGE image showing transmural LGE on a thin and aneurysmatic inferolateral wall segment (red arrow).

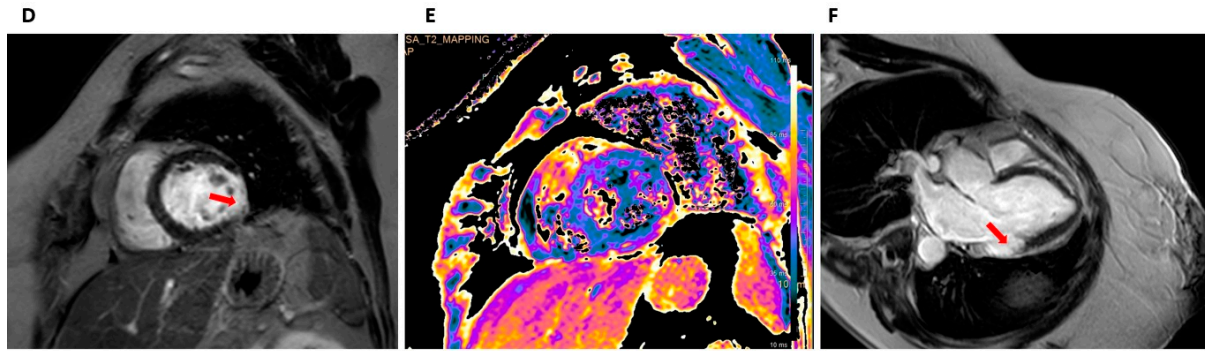

**Figure S3.** Additional histological findings from an endomyocardial biopsy performed after 3 months of follow-up following the index hospitalization. Hematoxylin-eosin stains of heart-tissue specimens showed resolution of myocarditis without inflammation, cardiomyocyte damage, or interstitial edema (Panel A). Masson's trichrome staining for collagen deposition highlighted interstitial fibrosis within the myocardium (blue dye) (Panel B). Immunohistochemistry stains showed no lymphocyte (Panel C, CD3 immunostaining for T-cells, and Panel D, CD20 stain for B-cells) or macrophage (Panel E, CD68 stain) infiltration. Original magnification, x200; scale bars, 100  $\mu$ m.

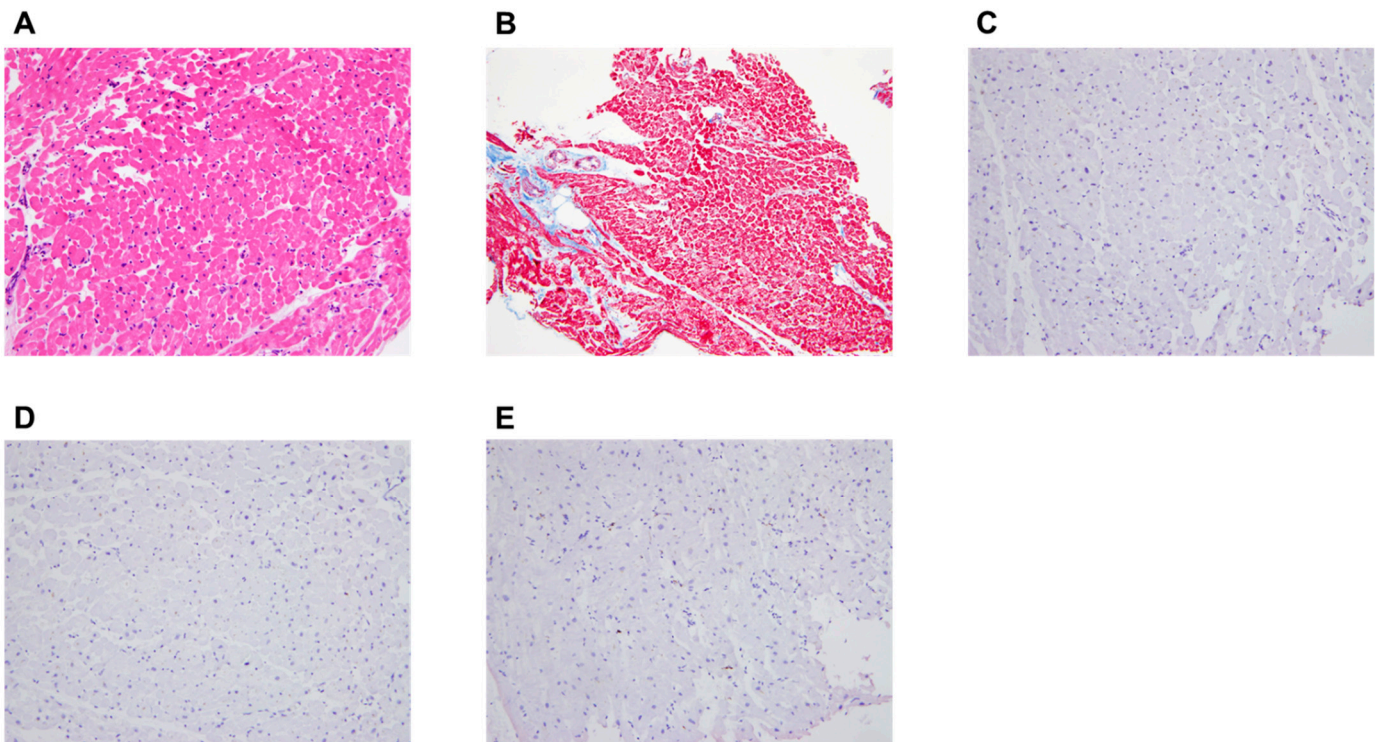

Supplement: s1 [file s1]
